# Supplementary material for: Potential Associations Among Alteration of Salivary miRNAs, Saliva Microbiome Structure, and Cognitive Impairments in Autistic Children
Source: MDPI journal article supplement (doi:10.3390/ijms21176203), 2020-08-27
Supplement: s1 [file s1]

**Potential associations among alteration of salivary miRNAs, saliva microbiome structure and cognitive impairments in autistic children**

Marco Ragusa<sup>1,2§</sup>, Maria Santagati<sup>3§</sup>, Federica Mirabella<sup>1§</sup>, Giovanni Lauretta<sup>1</sup>, Matilde Cirnigliaro<sup>1</sup>, Duilia Brex<sup>1</sup>, Cristina Barbagallo<sup>1</sup>, Carla Noemi Domini<sup>4</sup>, Mariangela Gulisano<sup>4</sup>, Rita Barone<sup>4</sup>, Laura Trovato<sup>3</sup>, Salvatore Oliveri<sup>3</sup>, Gino Mongelli<sup>3,5</sup>, Ambra Spitale<sup>3</sup>, Davide Barbagallo<sup>1</sup>, Cinzia Di Pietro<sup>1†</sup>, Stefania Stefani<sup>3†</sup>, Renata Rizzo<sup>4†</sup>, Michele Purrello<sup>1\*</sup>.

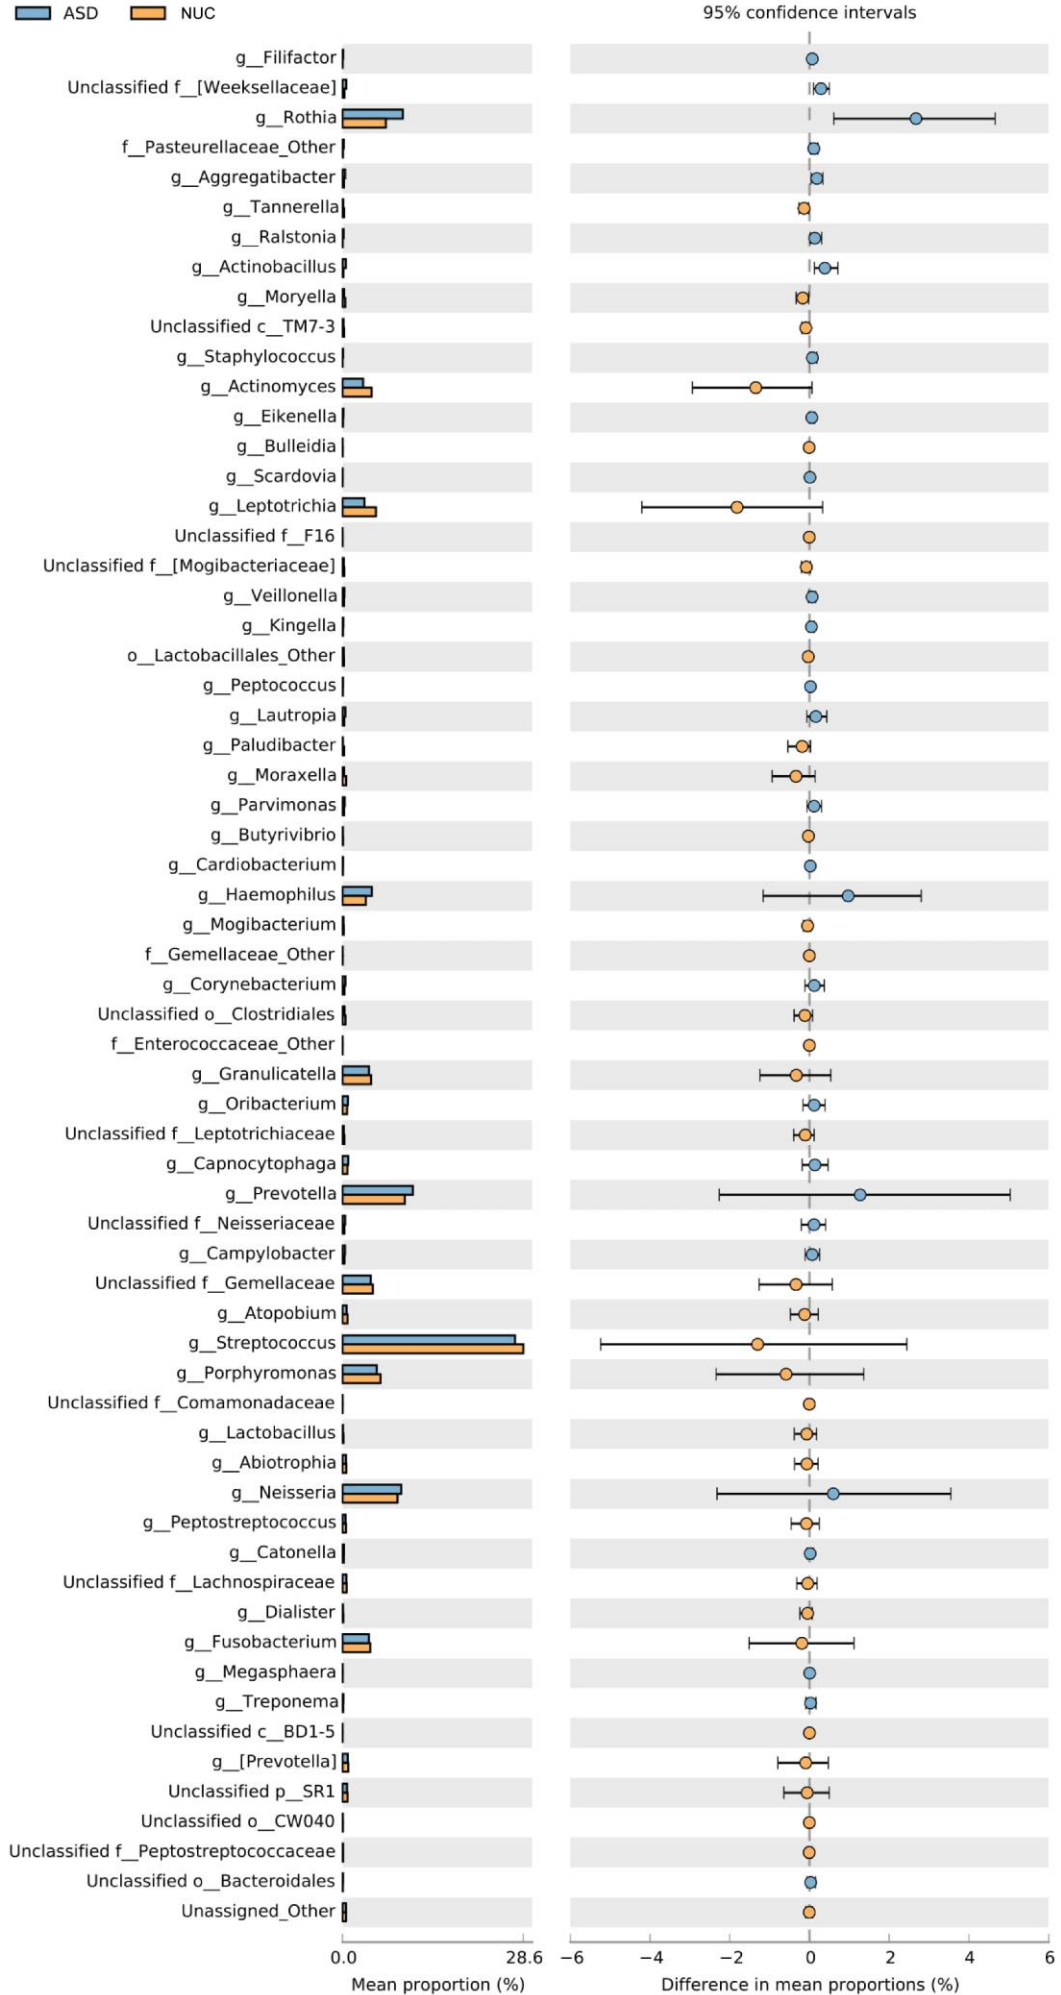

**Supplementary Figure S2.** The bacterial taxonomic abundance of all genera in ASD and NUC samples; this figure was produced using STAMP.
