# Supplementary material for: Potential Associations Among Alteration of Salivary miRNAs, Saliva Microbiome Structure, and Cognitive Impairments in Autistic Children
Source: MDPI journal article supplement (doi:10.3390/ijms21176203), 2020-08-27
Supplement: s1 [file s1]

## **Potential associations among alteration of salivary miRNAs, saliva microbiome structure and cognitive impairments in autistic children**

Marco Ragusa<sup>1,2§</sup>, Maria Santagati<sup>3§</sup>, Federica Mirabella<sup>1§</sup>, Giovanni Lauretta<sup>1</sup>, Matilde Cirnigliaro<sup>1</sup>, Duilia Brex<sup>1</sup>, Cristina Barbagallo<sup>1</sup>, Carla Noemi Domini<sup>4</sup>, Mariangela Gulisano<sup>4</sup>, Rita Barone<sup>4</sup>, Laura Trovato<sup>3</sup>, Salvatore Oliveri<sup>3</sup>, Gino Mongelli<sup>3,5</sup>, Ambra Spitale<sup>3</sup>, Davide Barbagallo<sup>1</sup>, Cinzia Di Pietro<sup>1†</sup>, Stefania Stefani<sup>3†</sup>, Renata Rizzo<sup>4†</sup>, Michele Purrello<sup>1\*</sup>.

| Species       | <i>Actinobacillus parahaemolyticus</i> |              |        |              |        |              |
|---------------|----------------------------------------|--------------|--------|--------------|--------|--------------|
| Type of model | NBR                                    |              | MLR    |              | SLR    |              |
| Model results | B                                      | p-value      | B      | p-value      | B      | p-value      |
| let-7b-5p     | 1.050                                  | 0.232        | 1.094  | <b>0.006</b> | -0.007 | 0.726        |
| miR-451a      | -0.851                                 | 0.101        | -0.217 | 0.323        | -0.025 | 0.355        |
| miR-29a-3p    | -0.244                                 | 0.409        | -0.178 | 0.151        | -0.016 | 0.656        |
| miR-16-5p     | -0.160                                 | 0.651        | -0.318 | <b>0.041</b> | -0.003 | 0.696        |
| miR-141-3p    | 0.059                                  | <b>0.000</b> | 0.030  | <b>0.001</b> | 0.027  | <b>0.000</b> |
| VIQ           | -0.020                                 | 0.659        | 0.002  | 0.927        | -0.005 | 0.270        |
| PIQ           | -0.090                                 | 0.088        | -0.046 | <b>0.043</b> | -0.006 | 0.186        |
| TIQ           | 0.119                                  | 0.200        | 0.048  | 0.201        | -0.004 | 0.421        |
| ADI-A         | 0.278                                  | 0.063        | -0.010 | 0.891        | 0.032  | 0.110        |
| ADI-B         | -0.049                                 | 0.810        | 0.192  | 0.108        | 0.042  | 0.070        |
| ADI-C         | -0.473                                 | <b>0.000</b> | -0.174 | <b>0.006</b> | 0.021  | 0.472        |
| ADI-D         | 0.498                                  | <b>0.010</b> | 0.103  | 0.379        | 0.117  | <b>0.032</b> |
| ADOS-A        | 0.086                                  | 0.660        | 0.006  | 0.949        | 0.065  | 0.118        |
| ADOS-B        | -0.023                                 | 0.870        | 0.014  | 0.859        | 0.049  | <b>0.043</b> |
| ADOS-C        | -0.602                                 | 0.057        | -0.191 | 0.152        | 0.093  | 0.185        |
| ADOS-D        | 0.577                                  | 0.091        | 0.163  | 0.211        | 0.118  | 0.052        |
| Ammonium      | -0.145                                 | <b>0.000</b> | -0.035 | <b>0.044</b> | 0.002  | 0.901        |
| Lactate       | 0.142                                  | <b>0.009</b> | 0.034  | 0.253        | 0.033  | 0.286        |
| Ceruloplasmin | -0.121                                 | <b>0.021</b> | -0.023 | 0.427        | -0.006 | 0.827        |
| Prolactin     | 0.000                                  | 0.904        | 0.000  | 0.900        | 0.001  | 0.535        |
| TSH           | 0.262                                  | 0.430        | 0.333  | 0.082        | 0.063  | 0.726        |

| Species       | <i>Filifactor spp</i> |              |        |              |        |              |
|---------------|-----------------------|--------------|--------|--------------|--------|--------------|
| Type of model | NBR                   |              | MLR    |              | SLR    |              |
| Model results | B                     | p-value      | B      | p-value      | B      | p-value      |
| let-7b-5p     | -0.886                | 0.221        | -0.045 | 0.423        | -0.002 | 0.384        |
| miR-451a      | -0.512                | 0.322        | 0.035  | 0.281        | -0.002 | 0.543        |
| miR-29a-3p    | 0.455                 | 0.060        | 0.039  | <b>0.040</b> | 0.002  | 0.664        |
| miR-16-5p     | 0.227                 | 0.497        | 0.000  | 0.997        | -0.001 | 0.622        |
| miR-141-3p    | -0.061                | <b>0.000</b> | -0.003 | <b>0.035</b> | -0.001 | 0.335        |
| VIQ           | -0.064                | 0.177        | -0.004 | 0.255        | -0.001 | <b>0.049</b> |
| PIQ           | -0.098                | <b>0.042</b> | -0.008 | <b>0.014</b> | -0.002 | <b>0.001</b> |
| TIQ           | 0.123                 | 0.133        | 0.010  | 0.068        | -0.002 | <b>0.004</b> |
| ADI-A         | 0.236                 | 0.053        | 0.022  | 0.055        | 0.007  | <b>0.007</b> |
| ADI-B         | -0.072                | 0.723        | -0.022 | 0.211        | 0.007  | <b>0.034</b> |
| ADI-C         | 0.101                 | 0.410        | -0.005 | 0.611        | 0.008  | <b>0.040</b> |
| ADI-D         | -0.295                | 0.153        | -0.009 | 0.623        | 0.015  | <b>0.044</b> |
| ADOS-A        | -0.605                | <b>0.003</b> | -0.015 | 0.297        | 0.006  | 0.269        |
| ADOS-B        | -0.263                | 0.067        | -0.020 | 0.103        | 0.005  | 0.141        |
| ADOS-C        | 0.390                 | 0.087        | 0.003  | 0.862        | 0.013  | 0.177        |
| ADOS-D        | -0.215                | 0.326        | 0.008  | 0.671        | 0.015  | 0.059        |

|                      |        |       |        |       |        |       |
|----------------------|--------|-------|--------|-------|--------|-------|
| <b>Ammonium</b>      | 0.002  | 0.950 | -0.001 | 0.572 | -0.003 | 0.190 |
| <b>Lactate</b>       | -0.041 | 0.467 | -0.005 | 0.274 | -0.007 | 0.060 |
| <b>Ceruloplasmin</b> | 0.068  | 0.336 | 0.001  | 0.869 | -0.002 | 0.510 |
| <b>Prolactin</b>     | 0.003  | 0.296 | 0.000  | 0.373 | 0.000  | 0.763 |
| <b>TSH</b>           | -0.326 | 0.429 | 0.006  | 0.841 | 0.030  | 0.196 |

| Species              | <i>Moryella spp</i> |              |        |              |        |              |
|----------------------|---------------------|--------------|--------|--------------|--------|--------------|
| Type of model        | NBR                 |              | MLR    |              | SLR    |              |
| Model results        | B                   | p-value      | B      | p-value      | B      | p-value      |
| <b>let-7b-5p</b>     | -0.079              | 0.846        | -0.063 | 0.623        | -0.001 | 0.845        |
| <b>miR-451a</b>      | -0.450              | 0.079        | 0.009  | 0.900        | -0.006 | 0.528        |
| <b>miR-29a-3p</b>    | 0.045               | 0.739        | -0.016 | 0.695        | -0.019 | 0.141        |
| <b>miR-16-5p</b>     | 0.064               | 0.697        | 0.020  | 0.705        | -0.002 | 0.418        |
| <b>miR-141-3p</b>    | -0.051              | <b>0.000</b> | -0.006 | <b>0.049</b> | -0.005 | <b>0.029</b> |
| <b>VIQ</b>           | -0.034              | 0.141        | -0.006 | 0.398        | 0.005  | <b>0.001</b> |
| <b>PIQ</b>           | -0.031              | 0.185        | -0.003 | 0.738        | 0.005  | <b>0.002</b> |
| <b>TIQ</b>           | 0.055               | 0.148        | 0.009  | 0.465        | 0.005  | <b>0.001</b> |
| <b>ADI-A</b>         | -0.128              | 0.215        | -0.019 | 0.458        | -0.018 | <b>0.010</b> |
| <b>ADI-B</b>         | -0.047              | 0.710        | 0.021  | 0.599        | -0.019 | <b>0.020</b> |
| <b>ADI-C</b>         | -0.051              | 0.429        | 0.006  | 0.786        | -0.023 | <b>0.027</b> |
| <b>ADI-D</b>         | -0.130              | 0.281        | -0.073 | 0.077        | -0.059 | <b>0.002</b> |
| <b>ADOS-A</b>        | 0.044               | 0.616        | 0.031  | 0.354        | -0.025 | 0.093        |
| <b>ADOS-B</b>        | -0.158              | 0.072        | -0.009 | 0.741        | -0.018 | <b>0.041</b> |
| <b>ADOS-C</b>        | 0.152               | 0.335        | 0.032  | 0.480        | -0.038 | 0.132        |
| <b>ADOS-D</b>        | -0.098              | 0.482        | -0.017 | 0.697        | -0.038 | 0.083        |
| <b>Ammonium</b>      | 0.013               | 0.496        | 0.009  | 0.134        | 0.002  | 0.650        |
| <b>Lactate</b>       | 0.020               | 0.492        | -0.013 | 0.196        | -0.011 | 0.174        |
| <b>Ceruloplasmin</b> | 0.106               | <b>0.003</b> | 0.021  | <b>0.039</b> | 0.017  | <b>0.026</b> |
| <b>Prolactin</b>     | 0.003               | <b>0.022</b> | 0.000  | 0.752        | 0.000  | 0.901        |
| <b>TSH</b>           | 0.003               | 0.988        | 0.022  | 0.730        | -0.008 | 0.868        |

| Species           | <i>Pasteurellaceae</i> |         |        |         |        |              |
|-------------------|------------------------|---------|--------|---------|--------|--------------|
| Type of model     | NBR                    |         | MLR    |         | SLR    |              |
| Model results     | B                      | p-value | B      | p-value | B      | p-value      |
| <b>let-7b-5p</b>  | 0.734                  | 0.281   | 0.069  | 0.664   | 0.000  | 0.976        |
| <b>miR-451a</b>   | -0.023                 | 0.945   | 0.036  | 0.694   | -0.003 | 0.699        |
| <b>miR-29a-3p</b> | 0.159                  | 0.421   | 0.046  | 0.380   | 0.009  | 0.461        |
| <b>miR-16-5p</b>  | -0.272                 | 0.351   | -0.040 | 0.535   | 0.000  | 0.873        |
| <b>miR-141-3p</b> | 0.021                  | 0.175   | 0.004  | 0.264   | 0.005  | <b>0.015</b> |
| <b>VIQ</b>        | 0.020                  | 0.617   | 0.003  | 0.737   | -0.002 | 0.077        |
| <b>PIQ</b>        | 0.082                  | 0.064   | 0.006  | 0.508   | -0.002 | 0.154        |
| <b>TIQ</b>        | -0.082                 | 0.285   | -0.006 | 0.692   | -0.002 | 0.137        |
| <b>ADI-A</b>      | -0.117                 | 0.454   | -0.019 | 0.557   | 0.006  | 0.360        |
| <b>ADI-B</b>      | -0.197                 | 0.320   | -0.032 | 0.516   | 0.010  | 0.183        |

|                      |        |              |        |              |        |              |
|----------------------|--------|--------------|--------|--------------|--------|--------------|
| <b>ADI-C</b>         | -0.134 | 0.194        | -0.006 | 0.803        | 0.009  | 0.354        |
| <b>ADI-D</b>         | 0.406  | <b>0.046</b> | 0.037  | 0.456        | 0.030  | 0.085        |
| <b>ADOS-A</b>        | -0.258 | 0.087        | -0.027 | 0.509        | 0.020  | 0.118        |
| <b>ADOS-B</b>        | 0.199  | 0.116        | 0.024  | 0.481        | 0.016  | <b>0.031</b> |
| <b>ADOS-C</b>        | 0.055  | 0.814        | 0.044  | 0.428        | 0.059  | <b>0.006</b> |
| <b>ADOS-D</b>        | 0.400  | 0.116        | 0.070  | 0.207        | 0.045  | <b>0.017</b> |
| <b>Ammonium</b>      | -0.029 | 0.334        | -0.002 | 0.810        | 0.002  | 0.783        |
| <b>Lactate</b>       | 0.082  | 0.057        | 0.006  | 0.615        | 0.012  | 0.208        |
| <b>Ceruloplasmin</b> | -0.100 | <b>0.019</b> | -0.026 | <b>0.040</b> | -0.011 | 0.212        |
| <b>Prolactin</b>     | 0.000  | 0.866        | 0.000  | 0.780        | 0.000  | 0.908        |
| <b>TSH</b>           | -0.294 | 0.329        | -0.051 | 0.520        | -0.016 | 0.773        |

| Species              | <i>Ralstonia spp</i> |              |        |         |        |         |
|----------------------|----------------------|--------------|--------|---------|--------|---------|
| Type of model        | NBR                  |              | MLR    |         | SLR    |         |
| Model results        | B                    | p-value      | B      | p-value | B      | p-value |
| <b>let-7b-5p</b>     | -1.763               | 0.203        | -0.168 | 0.547   | 0.007  | 0.513   |
| <b>miR-451a</b>      | -2.747               | 0.112        | -0.065 | 0.692   | 0.003  | 0.831   |
| <b>miR-29a-3p</b>    | 0.419                | 0.135        | 0.062  | 0.500   | 0.023  | 0.221   |
| <b>miR-16-5p</b>     | 1.174                | 0.064        | 0.066  | 0.558   | 0.004  | 0.358   |
| <b>miR-141-3p</b>    | -0.049               | 0.063        | -0.003 | 0.575   | -0.002 | 0.501   |
| <b>VIQ</b>           | 0.233                | <b>0.002</b> | 0.001  | 0.965   | -0.003 | 0.211   |
| <b>PIQ</b>           | 0.151                | <b>0.031</b> | -0.001 | 0.948   | -0.004 | 0.095   |
| <b>TIQ</b>           | -0.350               | <b>0.005</b> | -0.005 | 0.865   | -0.004 | 0.085   |
| <b>ADI-A</b>         | 0.102                | 0.704        | 0.019  | 0.737   | 0.014  | 0.164   |
| <b>ADI-B</b>         | 0.107                | 0.765        | -0.049 | 0.580   | 0.014  | 0.230   |
| <b>ADI-C</b>         | -0.024               | 0.893        | 0.017  | 0.702   | 0.012  | 0.414   |
| <b>ADI-D</b>         | -0.027               | 0.942        | -0.006 | 0.941   | 0.036  | 0.199   |
| <b>ADOS-A</b>        | -0.372               | 0.278        | 0.058  | 0.419   | 0.040  | 0.053   |
| <b>ADOS-B</b>        | 0.120                | 0.640        | -0.051 | 0.392   | 0.015  | 0.211   |
| <b>ADOS-C</b>        | 0.095                | 0.828        | -0.017 | 0.862   | 0.055  | 0.118   |
| <b>ADOS-D</b>        | 0.380                | 0.368        | 0.066  | 0.496   | 0.045  | 0.143   |
| <b>Ammonium</b>      | 0.077                | 0.152        | 0.005  | 0.692   | -0.007 | 0.445   |
| <b>Lactate</b>       | -0.036               | 0.767        | -0.010 | 0.656   | -0.024 | 0.117   |
| <b>Ceruloplasmin</b> | 0.119                | 0.180        | 0.036  | 0.098   | 0.025  | 0.075   |
| <b>Prolactin</b>     | -0.009               | 0.066        | 0.000  | 0.928   | 0.000  | 0.764   |
| <b>TSH</b>           | -0.679               | 0.308        | -0.077 | 0.582   | -0.105 | 0.245   |

| Species           | <i>Tannerella spp</i> |              |        |         |       |         |
|-------------------|-----------------------|--------------|--------|---------|-------|---------|
| Type of model     | NBR                   |              | MLR    |         | SLR   |         |
| Model results     | B                     | p-value      | B      | p-value | B     | p-value |
| <b>let-7b-5p</b>  | -1.130                | <b>0.002</b> | -0.076 | 0.215   | 0.005 | 0.344   |
| <b>miR-451a</b>   | -0.008                | 0.980        | 0.027  | 0.442   | 0.003 | 0.652   |
| <b>miR-29a-3p</b> | -0.095                | 0.482        | -0.010 | 0.632   | 0.001 | 0.931   |
| <b>miR-16-5p</b>  | 0.429                 | <b>0.003</b> | 0.024  | 0.326   | 0.001 | 0.490   |

|                      |        |              |        |              |        |              |
|----------------------|--------|--------------|--------|--------------|--------|--------------|
| <b>miR-141-3p</b>    | -0.035 | <b>0.000</b> | -0.003 | 0.055        | -0.003 | 0.083        |
| <b>VIQ</b>           | -0.048 | <b>0.040</b> | -0.006 | 0.067        | 0.002  | 0.093        |
| <b>PIQ</b>           | -0.059 | <b>0.008</b> | -0.008 | <b>0.025</b> | 0.002  | 0.064        |
| <b>TIQ</b>           | 0.089  | <b>0.025</b> | 0.013  | <b>0.040</b> | 0.002  | <b>0.049</b> |
| <b>ADI-A</b>         | 0.069  | 0.339        | 0.017  | 0.167        | -0.010 | <b>0.038</b> |
| <b>ADI-B</b>         | 0.014  | 0.903        | 0.003  | 0.896        | -0.015 | <b>0.011</b> |
| <b>ADI-C</b>         | 0.146  | <b>0.028</b> | 0.009  | 0.382        | -0.013 | 0.080        |
| <b>ADI-D</b>         | -0.162 | 0.145        | -0.018 | 0.339        | -0.029 | <b>0.036</b> |
| <b>ADOS-A</b>        | 0.181  | <b>0.044</b> | 0.009  | 0.543        | -0.025 | <b>0.015</b> |
| <b>ADOS-B</b>        | -0.195 | <b>0.009</b> | -0.027 | <b>0.047</b> | -0.017 | <b>0.006</b> |
| <b>ADOS-C</b>        | 0.146  | 0.313        | 0.004  | 0.859        | -0.037 | <b>0.031</b> |
| <b>ADOS-D</b>        | 0.017  | 0.888        | 0.004  | 0.858        | -0.034 | <b>0.025</b> |
| <b>Ammonium</b>      | 0.024  | 0.183        | 0.002  | 0.439        | 0.000  | 0.868        |
| <b>Lactate</b>       | -0.001 | 0.957        | -0.001 | 0.890        | -0.005 | 0.223        |
| <b>Ceruloplasmin</b> | 0.024  | 0.447        | 0.005  | 0.302        | -0.001 | 0.731        |
| <b>Prolactin</b>     | -0.084 | 0.955        | 0.000  | 0.981        | 0.000  | 0.600        |
| <b>TSH</b>           | -0.073 | 0.711        | -0.004 | 0.883        | 0.017  | 0.453        |

| Species              | <i>Weeksellaceae</i> |              |        |              |        |              |
|----------------------|----------------------|--------------|--------|--------------|--------|--------------|
| Type of model        | NBR                  |              | MLR    |              | SLR    |              |
| Model results        | B                    | p-value      | B      | p-value      | B      | p-value      |
| <b>let-7b-5p</b>     | 0.123                | 0.712        | 0.325  | 0.192        | -0.006 | 0.653        |
| <b>miR-451a</b>      | -0.580               | <b>0.002</b> | -0.280 | 0.058        | -0.013 | 0.468        |
| <b>miR-29a-3p</b>    | 0.060                | 0.606        | 0.036  | 0.657        | 0.003  | 0.914        |
| <b>miR-16-5p</b>     | 0.046                | 0.734        | -0.071 | 0.474        | -0.002 | 0.703        |
| <b>miR-141-3p</b>    | 0.026                | <b>0.001</b> | 0.025  | <b>0.000</b> | 0.022  | <b>0.000</b> |
| <b>VIQ</b>           | -0.061               | <b>0.002</b> | -0.026 | 0.059        | -0.004 | 0.131        |
| <b>PIQ</b>           | -0.038               | <b>0.049</b> | -0.025 | 0.089        | -0.002 | 0.521        |
| <b>TIQ</b>           | 0.086                | <b>0.011</b> | 0.047  | 0.058        | -0.002 | 0.528        |
| <b>ADI-A</b>         | 0.071                | 0.263        | 0.038  | 0.443        | 0.018  | 0.160        |
| <b>ADI-B</b>         | -0.183               | 0.062        | -0.027 | 0.729        | 0.024  | 0.120        |
| <b>ADI-C</b>         | 0.050                | 0.326        | 0.027  | 0.500        | 0.026  | 0.187        |
| <b>ADI-D</b>         | -0.070               | 0.501        | -0.104 | 0.180        | 0.031  | 0.393        |
| <b>ADOS-A</b>        | -0.008               | 0.924        | 0.009  | 0.891        | 0.035  | 0.205        |
| <b>ADOS-B</b>        | 0.016                | 0.813        | 0.000  | 0.999        | 0.020  | 0.219        |
| <b>ADOS-C</b>        | -0.196               | 0.052        | -0.169 | 0.057        | 0.000  | 0.994        |
| <b>ADOS-D</b>        | -0.036               | 0.762        | 0.003  | 0.968        | 0.023  | 0.576        |
| <b>Ammonium</b>      | -0.028               | 0.061        | -0.015 | 0.168        | 0.003  | 0.815        |
| <b>Lactate</b>       | 0.004                | 0.862        | 0.008  | 0.667        | 0.021  | 0.287        |
| <b>Ceruloplasmin</b> | -0.003               | 0.918        | 0.005  | 0.772        | -0.001 | 0.940        |
| <b>Prolactin</b>     | 0.001                | 0.557        | 0.000  | 0.624        | 0.000  | 0.954        |
| <b>TSH</b>           | 0.063                | 0.702        | 0.030  | 0.806        | -0.043 | 0.712        |

**Supplementary Table S3.** Comparison between parameters estimated from the negative binomial regression (NBR), multiple linear regression (MLR) and simple linear regression (SLR) models predicting abundances of microbiome species: regression coefficient (B); statistical significance of the independent variables (p-values). Data for those MLR which statistical significance of overall model was not reached ( $p > 0.05$ ) are shown in italic. Statistically significant p-values are indicated in bold ( $p < 0.05$ ).
