# Supplementary material for: Potential Associations Among Alteration of Salivary miRNAs, Saliva Microbiome Structure, and Cognitive Impairments in Autistic Children
Source: MDPI journal article supplement (doi:10.3390/ijms21176203), 2020-08-27
Supplement: s1 [file s1]

**Potential associations among alteration of salivary miRNAs, saliva microbiome structure and cognitive impairments in autistic children**

Marco Ragusa<sup>1,2§</sup>, Maria Santagati<sup>3§</sup>, Federica Mirabella<sup>1§</sup>, Giovanni Lauretta<sup>1</sup>, Matilde Cirnigliaro<sup>1</sup>, Duilia Brex<sup>1</sup>, Cristina Barbagallo<sup>1</sup>, Carla Noemi Domini<sup>4</sup>, Mariangela Gulisano<sup>4</sup>, Rita Barone<sup>4</sup>, Laura Trovato<sup>3</sup>, Salvatore Oliveri<sup>3</sup>, Gino Mongelli<sup>3,5</sup>, Ambra Spitale<sup>3</sup>, Davide Barbagallo<sup>1</sup>, Cinzia Di Pietro<sup>1†</sup>, Stefania Stefani<sup>3†</sup>, Renata Rizzo<sup>4†</sup>, Michele Purrello<sup>1\*</sup>.

| Species       | <i>Actinobacillus parahaemolyticus</i> |              |              |              |                 |
|---------------|----------------------------------------|--------------|--------------|--------------|-----------------|
| Model results | B                                      | Lower 95% CL | Upper 95% CL | p-value      | SMD effect size |
| let-7b-5p     | 1.050                                  | -0.673       | 2.774        | 0.232        | 1.387           |
| miR-451a      | -0.851                                 | -1.866       | 0.165        | 0.101        | -0.428          |
| miR-29a-3p    | -0.244                                 | -0.824       | 0.335        | 0.409        | -0.162          |
| miR-16-5p     | -0.16                                  | -0.856       | 0.535        | 0.651        | -0.110          |
| miR-141-3p    | 0.059                                  | 0.028        | 0.09         | <b>0.000</b> | 0.045           |
| VIQ           | -0.02                                  | -0.109       | 0.069        | 0.659        | -0.015          |
| PIQ           | -0.09                                  | -0.194       | 0.013        | 0.088        | -0.064          |
| TIQ           | 0.119                                  | -0.063       | 0.301        | 0.200        | 0.094           |
| ADI-A         | 0.278                                  | -0.015       | 0.571        | 0.063        | 0.239           |
| ADI-B         | -0.049                                 | -0.446       | 0.349        | 0.81         | -0.036          |
| ADI-C         | -0.473                                 | -0.706       | -0.24        | <b>0.000</b> | -0.281          |
| ADI-D         | 0.498                                  | 0.12         | 0.877        | <b>0.010</b> | 0.482           |
| ADOS-A        | 0.086                                  | -0.297       | 0.469        | 0.66         | 0.067           |
| ADOS-B        | -0.023                                 | -0.298       | 0.253        | 0.870        | -0.017          |
| ADOS-C        | -0.602                                 | -1.222       | 0.017        | 0.057        | -0.338          |
| ADOS-D        | 0.577                                  | -0.093       | 1.247        | 0.091        | 0.583           |
| Ammonium      | -0.145                                 | -0.216       | -0.074       | <b>0.000</b> | -0.101          |
| Lactate       | 0.142                                  | 0.035        | 0.249        | <b>0.009</b> | 0.114           |
| Ceruloplasmin | -0.121                                 | -0.224       | -0.019       | <b>0.021</b> | -0.085          |
| Prolactin     | 0.000                                  | -0.005       | 0.005        | 0.904        | 0.000           |
| TSH           | 0.262                                  | -0.388       | 0.912        | 0.430        | 0.224           |

| Species       | <i>Filifactor spp</i> |              |              |              |                 |
|---------------|-----------------------|--------------|--------------|--------------|-----------------|
| Model results | B                     | Lower 95% CL | Upper 95% CL | p-value      | SMD effect size |
| let-7b-5p     | -0.886                | 0.7233       | -2.303       | 0.221        | -0.429          |
| miR-451a      | -0.512                | 0.5175       | -1.527       | 0.322        | -0.293          |
| miR-29a-3p    | 0.455                 | 0.2417       | -0.019       | 0.06         | 0.421           |
| miR-16-5p     | 0.227                 | 0.3344       | -0.428       | 0.497        | 0.186           |
| miR-141-3p    | -0.061                | 0.0157       | -0.092       | <b>0.000</b> | -0.043          |
| VIQ           | -0.064                | 0.0472       | -0.156       | 0.177        | -0.045          |
| PIQ           | -0.098                | 0.0482       | -0.193       | <b>0.042</b> | -0.068          |
| TIQ           | 0.123                 | 0.082        | -0.038       | 0.133        | 0.096           |
| ADI-A         | 0.236                 | 0.1223       | -0.003       | 0.053        | 0.194           |
| ADI-B         | -0.072                | 0.2043       | -0.473       | 0.723        | -0.051          |
| ADI-C         | 0.101                 | 0.122        | -0.139       | 0.410        | 0.078           |
| ADI-D         | -0.295                | 0.2066       | -0.700       | 0.153        | -0.187          |
| ADOS-A        | -0.605                | 0.2051       | -1.007       | <b>0.003</b> | -0.332          |
| ADOS-B        | -0.263                | 0.1434       | -0.544       | 0.067        | -0.169          |
| ADOS-C        | 0.390                 | 0.228        | -0.057       | 0.087        | 0.349           |
| ADOS-D        | -0.215                | 0.219        | -0.645       | 0.326        | -0.141          |

|                      |        |        |        |       |        |
|----------------------|--------|--------|--------|-------|--------|
| <b>Ammonium</b>      | 0.002  | 0.037  | -0.07  | 0.95  | 0.001  |
| <b>Lactate</b>       | -0.041 | 0.0559 | -0.150 | 0.467 | -0.029 |
| <b>Ceruloplasmin</b> | 0.068  | 0.0708 | -0.071 | 0.336 | 0.051  |
| <b>Prolactin</b>     | 0.003  | 0.0027 | -0.002 | 0.296 | 0.002  |
| <b>TSH</b>           | -0.326 | 0.4127 | -1.135 | 0.429 | -0.203 |

| Species              | <i>Moryella spp</i> |              |              |              |                 |
|----------------------|---------------------|--------------|--------------|--------------|-----------------|
| Model results        | B                   | Lower 95% CL | Upper 95% CL | p-value      | SMD effect size |
| <b>let-7b-5p</b>     | -0.079              | -0.875       | 0.717        | 0.846        | -0.090          |
| <b>miR-451a</b>      | -0.450              | -0.952       | 0.052        | 0.079        | -0.439          |
| <b>miR-29a-3p</b>    | 0.045               | -0.22        | 0.311        | 0.739        | 0.056           |
| <b>miR-16-5p</b>     | 0.064               | -0.257       | 0.384        | 0.697        | 0.08            |
| <b>miR-141-3p</b>    | -0.051              | -0.069       | -0.033       | <b>0.000</b> | -0.06           |
| <b>VIQ</b>           | -0.034              | -0.079       | 0.011        | 0.141        | -0.041          |
| <b>PIQ</b>           | -0.031              | -0.077       | 0.015        | 0.185        | -0.037          |
| <b>TIQ</b>           | 0.055               | -0.02        | 0.13         | 0.148        | 0.069           |
| <b>ADI-A</b>         | -0.128              | -0.329       | 0.074        | 0.215        | -0.146          |
| <b>ADI-B</b>         | -0.047              | -0.293       | 0.199        | 0.71         | -0.056          |
| <b>ADI-C</b>         | -0.051              | -0.177       | 0.075        | 0.429        | -0.06           |
| <b>ADI-D</b>         | -0.130              | -0.367       | 0.106        | 0.281        | 0.148           |
| <b>ADOS-A</b>        | 0.044               | -0.128       | 0.216        | 0.616        | 0.055           |
| <b>ADOS-B</b>        | -0.158              | -0.331       | 0.014        | 0.072        | -0.177          |
| <b>ADOS-C</b>        | 0.152               | -0.158       | 0.462        | 0.335        | 0.199           |
| <b>ADOS-D</b>        | -0.098              | -0.372       | 0.176        | 0.482        | -0.113          |
| <b>Ammonium</b>      | 0.013               | -0.024       | 0.049        | 0.496        | 0.016           |
| <b>Lactate</b>       | 0.020               | -0.036       | 0.075        | 0.492        | 0.024           |
| <b>Ceruloplasmin</b> | 0.106               | 0.035        | 0.178        | <b>0.003</b> | 0.136           |
| <b>Prolactin</b>     | 0.003               | 0.000        | 0.006        | <b>0.022</b> | 0.004           |
| <b>TSH</b>           | 0.003               | -0.391       | 0.397        | 0.988        | 0.004           |

| Species           | <i>Pasteurellaceae</i> |              |              |         |                 |
|-------------------|------------------------|--------------|--------------|---------|-----------------|
| Model results     | B                      | Lower 95% CL | Upper 95% CL | p-value | SMD effect size |
| <b>let-7b-5p</b>  | 0.734                  | -0.599       | 2.066        | 0.281   | 0.939           |
| <b>miR-451a</b>   | -0.023                 | -0.686       | 0.639        | 0.945   | -0.02           |
| <b>miR-29a-3p</b> | 0.159                  | -0.228       | 0.547        | 0.421   | 0.149           |
| <b>miR-16-5p</b>  | -0.272                 | -0.844       | 0.300        | 0.351   | -0.206          |
| <b>miR-141-3p</b> | 0.021                  | -0.009       | 0.052        | 0.175   | 0.018           |
| <b>VIQ</b>        | 0.020                  | -0.060       | 0.100        | 0.617   | 0.018           |
| <b>PIQ</b>        | 0.082                  | -0.005       | 0.170        | 0.064   | 0.074           |
| <b>TIQ</b>        | -0.082                 | -0.233       | 0.068        | 0.285   | -0.068          |
| <b>ADI-A</b>      | -0.117                 | -0.421       | 0.188        | 0.454   | -0.096          |
| <b>ADI-B</b>      | -0.197                 | -0.584       | 0.191        | 0.32    | -0.155          |
| <b>ADI-C</b>      | -0.134                 | -0.337       | 0.068        | 0.194   | -0.109          |

|                      |        |        |        |              |        |
|----------------------|--------|--------|--------|--------------|--------|
| <b>ADI-D</b>         | 0.406  | 0.008  | 0.804  | <b>0.046</b> | 0.434  |
| <b>ADOS-A</b>        | -0.258 | -0.552 | 0.037  | 0.087        | -0.197 |
| <b>ADOS-B</b>        | 0.199  | -0.049 | 0.448  | 0.116        | 0.191  |
| <b>ADOS-C</b>        | 0.055  | -0.406 | 0.517  | 0.814        | 0.049  |
| <b>ADOS-D</b>        | 0.400  | -0.099 | 0.899  | 0.116        | 0.426  |
| <b>Ammonium</b>      | -0.029 | -0.089 | 0.030  | 0.334        | -0.025 |
| <b>Lactate</b>       | 0.082  | -0.002 | 0.167  | 0.057        | 0.074  |
| <b>Ceruloplasmin</b> | -0.100 | -0.184 | -0.017 | <b>0.019</b> | -0.082 |
| <b>Prolactin</b>     | 0.000  | -0.005 | 0.004  | 0.866        | 0.000  |
| <b>TSH</b>           | -0.294 | -0.884 | 0.296  | 0.329        | -0.221 |

| <b>Species</b>       | <i>Ralstonia spp</i> |                     |                     |                |                        |
|----------------------|----------------------|---------------------|---------------------|----------------|------------------------|
| <b>Model results</b> | <b>B</b>             | <b>Lower 95% CL</b> | <b>Upper 95% CL</b> | <b>p-value</b> | <b>SMD effect size</b> |
| <b>let-7b-5p</b>     | -1.763               | -4.475              | 0.950               | 0.203          | -0.284                 |
| <b>miR-451a</b>      | -2.747               | -6.132              | 0.637               | 0.112          | -0.321                 |
| <b>miR-29a-3p</b>    | 0.419                | -0.130              | 0.967               | 0.135          | 0.178                  |
| <b>miR-16-5p</b>     | 1174                 | -0.067              | 2.416               | 0.064          | 0.766                  |
| <b>miR-141-3p</b>    | -0.049               | -0.102              | 0.003               | 0.063          | -0.016                 |
| <b>VIQ</b>           | 0.233                | 0.085               | 0.380               | <b>0.002</b>   | 0.090                  |
| <b>PIQ</b>           | 0.151                | 0.014               | 0.288               | <b>0.031</b>   | 0.056                  |
| <b>TIQ</b>           | -0.350               | -0.592              | -0.107              | <b>0.005</b>   | -0.101                 |
| <b>ADI-A</b>         | 0.102                | -0.424              | 0.627               | 0.704          | 0.037                  |
| <b>ADI-B</b>         | 0.107                | -0.592              | 0.805               | 0.765          | 0.039                  |
| <b>ADI-C</b>         | -0.024               | -0.368              | 0.321               | 0.893          | -0.008                 |
| <b>ADI-D</b>         | -0.027               | -0.748              | 0.694               | 0.942          | -0.009                 |
| <b>ADOS-A</b>        | -0.372               | -1.045              | 0.301               | 0.278          | -0.106                 |
| <b>ADOS-B</b>        | 0.120                | -0.383              | 0.622               | 0.64           | 0.044                  |
| <b>ADOS-C</b>        | 0.095                | -0.767              | 0.958               | 0.828          | 0.034                  |
| <b>ADOS-D</b>        | 0.38                 | -0.446              | 1.206               | 0.368          | 0.158                  |
| <b>Ammonium</b>      | 0.077                | -0.028              | 0.183               | 0.152          | 0.027                  |
| <b>Lactate</b>       | -0.036               | -0.275              | 0.203               | 0.767          | -0.012                 |
| <b>Ceruloplasmin</b> | 0.119                | -0.055              | 0.292               | 0.180          | 0.043                  |
| <b>Prolactin</b>     | -0.009               | -0.019              | 0.001               | 0.066          | -0.003                 |
| <b>TSH</b>           | -0.679               | -1.985              | 0.627               | 0.308          | -0.169                 |

| <b>Species</b>       | <i>Tannerella spp</i> |                     |                     |                |                        |
|----------------------|-----------------------|---------------------|---------------------|----------------|------------------------|
| <b>Model results</b> | <b>B</b>              | <b>Lower 95% CL</b> | <b>Upper 95% CL</b> | <b>p-value</b> | <b>SMD effect size</b> |
| <b>let-7b-5p</b>     | -1.130                | -1.868              | -0.405              | <b>0.002</b>   | -0.875                 |
| <b>miR-451a</b>      | -0.008                | -0.603              | 0.588               | 0.980          | -0.010                 |
| <b>miR-29a-3p</b>    | -0.095                | -0.360              | 0.170               | 0.482          | -0.117                 |
| <b>miR-16-5p</b>     | 0.429                 | 0.148               | 0.709               | <b>0.003</b>   | 0.690                  |
| <b>miR-141-3p</b>    | -0.035                | -0.052              | -0.018              | <b>0.000</b>   | -0.044                 |
| <b>VIQ</b>           | -0.048                | -0.093              | -0.002              | <b>0.040</b>   | -0.060                 |

|                      |        |        |        |              |        |
|----------------------|--------|--------|--------|--------------|--------|
| <b>PIQ</b>           | -0.059 | -0.103 | -0.015 | <b>0.008</b> | -0.074 |
| <b>TIQ</b>           | 0.089  | 0.011  | 0.167  | <b>0.025</b> | 0.12   |
| <b>ADI-A</b>         | 0.069  | -0.073 | 0.212  | 0.339        | 0.092  |
| <b>ADI-B</b>         | 0.014  | -0.205 | 0.232  | 0.903        | 0.018  |
| <b>ADI-C</b>         | 0.146  | 0.016  | 0.275  | <b>0.028</b> | 0.203  |
| <b>ADI-D</b>         | -0.162 | -0.379 | 0.056  | 0.145        | -0.193 |
| <b>ADOS-A</b>        | 0.181  | 0.005  | 0.357  | <b>0.044</b> | 0.256  |
| <b>ADOS-B</b>        | -0.195 | -0.342 | -0.049 | <b>0.009</b> | -0.228 |
| <b>ADOS-C</b>        | 0.146  | -0.138 | 0.430  | 0.313        | 0.203  |
| <b>ADOS-D</b>        | 0.017  | -0.217 | 0.251  | 0.888        | 0.022  |
| <b>Ammonium</b>      | 0.024  | -0.011 | 0.059  | 0.183        | 0.031  |
| <b>Lactate</b>       | -0.001 | -0.055 | 0.052  | 0.957        | -0.001 |
| <b>Ceruloplasmin</b> | 0.024  | -0.039 | 0.087  | 0.447        | 0.031  |
| <b>Prolactin</b>     | 3.000  | -0.003 | 0.003  | 0.955        | -0.104 |
| <b>TSH</b>           | -0.073 | -0.461 | 0.315  | 0.711        | -0.091 |

| <b>Species</b>       | <i>Weeksellaceae</i> |                     |                     |                |                        |
|----------------------|----------------------|---------------------|---------------------|----------------|------------------------|
| <b>Model results</b> | <b>B</b>             | <b>Lower 95% CL</b> | <b>Upper 95% CL</b> | <b>p-value</b> | <b>SMD effect size</b> |
| <b>let-7b-5p</b>     | 0.123                | -0.529              | 0.774               | 0.712          | 0.190                  |
| <b>miR-451a</b>      | -0.580               | -0.941              | -0.219              | <b>0.002</b>   | -0.638                 |
| <b>miR-29a-3p</b>    | 0.06                 | -0.167              | 0.286               | 0.606          | 0.09                   |
| <b>miR-16-5p</b>     | 0.046                | -0.218              | 0.309               | 0.734          | 0.068                  |
| <b>miR-141-3p</b>    | 0.026                | 0.011               | 0.040               | <b>0.001</b>   | 0.038                  |
| <b>VIQ</b>           | -0.061               | -0.099              | -0.022              | <b>0.002</b>   | -0.086                 |
| <b>PIQ</b>           | -0.038               | -0.077              | 0.000               | <b>0.049</b>   | -0.054                 |
| <b>TIQ</b>           | 0.086                | 0.02                | 0.153               | <b>0.0110</b>  | 0.13                   |
| <b>ADI-A</b>         | 0.071                | -0.053              | 0.195               | 0.263          | 0.107                  |
| <b>ADI-B</b>         | -0.183               | -0.374              | 0.009               | 0.062          | -0.242                 |
| <b>ADI-C</b>         | 0.050                | -0.050              | 0.149               | 0.326          | 0.074                  |
| <b>ADI-D</b>         | -0.070               | -0.274              | 0.134               | 0.501          | -0.098                 |
| <b>ADOS-A</b>        | -0.008               | -0.163              | 0.148               | 0.924          | -0.012                 |
| <b>ADOS-B</b>        | 0.016                | -0.115              | 0.146               | 0.813          | 0.023                  |
| <b>ADOS-C</b>        | -0.196               | -0.394              | 0.002               | 0.052          | -0.051                 |
| <b>ADOS-D</b>        | -0.036               | -0.268              | 0.196               | 0.762          | -0.051                 |
| <b>Ammonium</b>      | -0.028               | -0.058              | 0.001               | 0.061          | -0.04                  |
| <b>Lactate</b>       | 0.004                | -0.041              | 0.049               | 0.862          | 0.006                  |
| <b>Ceruloplasmin</b> | -0.003               | -0.050              | 0.045               | 0.918          | -0.004                 |
| <b>Prolactin</b>     | 0.001                | -0.002              | 0.003               | 0.557          | 0.001                  |
| <b>TSH</b>           | 0.063                | -0.261              | 0.387               | 0.702          | 0.094                  |

**Supplementary Table S2.** Parameter estimates from the negative binomial regression model

predicting abundances of microbiome species: regression coefficient (B); lower and upper limits of

the 95% Wald confidence interval; p-values calculated by Wald Chi-Square test; Standardized mean difference (SMD) effect size. Statistically significant p-values are indicated in bold.
