# Supplementary material for: Potential Associations Among Alteration of Salivary miRNAs, Saliva Microbiome Structure, and Cognitive Impairments in Autistic Children
Source: MDPI journal article supplement (doi:10.3390/ijms21176203), 2020-08-27
Supplement: s1 [file s1]

# **Potential associations among alteration of salivary miRNAs, saliva microbiome structure and cognitive impairments in autistic children**

Marco Ragusa<sup>1,2§</sup>, Maria Santagati<sup>3§</sup>, Federica Mirabella<sup>1§</sup>, Giovanni Lauretta<sup>1</sup>, Matilde Cirnigliaro<sup>1</sup>, Duilia Brex<sup>1</sup>, Cristina Barbagallo<sup>1</sup>, Carla Noemi Domini<sup>4</sup>, Mariangela Gulisano<sup>4</sup>, Rita Barone<sup>4</sup>, Laura Trovato<sup>3</sup>, Salvatore Oliveri<sup>3</sup>, Gino Mongelli<sup>3,5</sup>, Ambra Spitale<sup>3</sup>, Davide Barbagallo<sup>1</sup>, Cinzia Di Pietro<sup>1†</sup>, Stefania Stefani<sup>3†</sup>, Renata Rizzo<sup>4†</sup>, Michele Purrello<sup>1\*</sup>.

|                           | White's non<br>parametric<br>t-test | Mann-Whitney-<br>Kruskal-Wallis test | T-<br>test/Anova |
|---------------------------|-------------------------------------|--------------------------------------|------------------|
|                           | P-values                            | P-values                             | P-values         |
| <b>g__Filifactor</b>      | 9.99E-04                            | 0.029812                             | 0.0016537        |
| <b>g__Rothia</b>          | 0.011                               | 0.030216                             | 0.012415         |
| <b>g__Actinobacillus</b>  | 0.016                               | 0.41668                              | 0.016316         |
| <b>f__weeksellaceae</b>   | 0.016                               | 0.038872                             | 0.011177         |
| <b>g__Ralstonia</b>       | 0.023                               | 0.046734                             | 0.078283         |
| <b>f__pasteurellaceae</b> | 0.029                               | 0.021476                             | 0.122916         |
| <b>g__Aggregatibacter</b> | 0.035                               | 0.16022                              | 0.020473         |
| <b>g__Tannerella</b>      | 0.044                               | 0.038368                             | 0.041844         |
| <b>c_TM7</b>              | 0.045                               | 0.027238                             | 0.015501         |
| <b>g__Moryella</b>        | 0.045                               | 0.027239                             | 0.033352         |

**Supplementary Table S1.** Statistical analysis of the bacterial abundance at the genus level in ASD and NUC groups by a two-sided White's non-parametric t-test, Mann-Whitney-Kruskal-Wallis test and T-test/Anova, p-value <0.05.
