# Supplementary material for: Potential Associations Among Alteration of Salivary miRNAs, Saliva Microbiome Structure, and Cognitive Impairments in Autistic Children
Source: MDPI journal article supplement (doi:10.3390/ijms21176203), 2020-08-27
Supplement: s1 [file s1]

# **Potential associations among alteration of salivary miRNAs, saliva microbiome structure and cognitive impairments in autistic children**

Marco Ragusa<sup>1,2§</sup>, Maria Santagati<sup>3§</sup>, Federica Mirabella<sup>1§</sup>, Giovanni Lauretta<sup>1</sup>, Matilde Cirnigliaro<sup>1</sup>, Duilia Brex<sup>1</sup>, Cristina Barbagallo<sup>1</sup>, Carla Noemi Domini<sup>4</sup>, Mariangela Gulisano<sup>4</sup>, Rita Barone<sup>4</sup>, Laura Trovato<sup>3</sup>, Salvatore Oliveri<sup>3</sup>, Gino Mongelli<sup>3,5</sup>, Ambra Spitale<sup>3</sup>, Davide Barbagallo<sup>1</sup>, Cinzia Di Pietro<sup>1†</sup>, Stefania Stefani<sup>3†</sup>, Renata Rizzo<sup>4†</sup>, Michele Purrello<sup>1\*</sup>.

| No | Sample | Read Pairs | Yield (Kbp)* | %Q30** | Mean Q <sup>†</sup> |
|----|--------|------------|--------------|--------|---------------------|
| 1  | ASD003 | 148,566    | 84,534       | 87.77  | 35.14               |
| 2  | ASD005 | 130,436    | 74,218       | 87.94  | 35.16               |
| 3  | ASD011 | 144,814    | 82,399       | 87.01  | 34.97               |
| 4  | ASD014 | 125,809    | 71,585       | 87.02  | 34.96               |
| 5  | ASD016 | 137,756    | 78,383       | 86.81  | 34.92               |
| 6  | ASD020 | 124,683    | 70,944       | 87.93  | 35.17               |
| 7  | ASD021 | 146,143    | 83,155       | 88.11  | 35.22               |
| 8  | ASD023 | 108,866    | 61,944       | 88.40  | 35.29               |
| 9  | ASD027 | 99,82      | 56,797       | 88.52  | 35.30               |
| 10 | ASD028 | 99,622     | 56,684       | 87.50  | 35.08               |
| 11 | ASD029 | 96,647     | 54,992       | 87.12  | 34.99               |
| 12 | ASD030 | 97,502     | 55,478       | 87.82  | 35.15               |
| 13 | ASD031 | 104,632    | 59,535       | 87.58  | 35.08               |
| 14 | ASD032 | 87,086     | 49,551       | 87.58  | 35.09               |
| 15 | ASD033 | 108,507    | 61,74        | 83.82  | 34.22               |
| 16 | ASD034 | 108,913    | 61,971       | 88.17  | 35.23               |
| 17 | ASD035 | 108,323    | 61,635       | 88.18  | 35.22               |
| 18 | ASD037 | 167,607    | 95,368       | 87.49  | 35.07               |
| 19 | ASD039 | 123,64     | 70,351       | 87.54  | 35.07               |
| 20 | ASD041 | 117,894    | 67,081       | 87.03  | 34.97               |
| 21 | ASD042 | 115,575    | 65,762       | 86.91  | 34.94               |
| 22 | ASD043 | 120,787    | 68,727       | 86.92  | 34.95               |
| 23 | ASD047 | 110,398    | 62,816       | 88.17  | 35.23               |
| 24 | ASD048 | 125,261    | 71,273       | 87.60  | 35.10               |
| 25 | ASD049 | 109,87     | 62,516       | 87.85  | 35.16               |
| 26 | ASD050 | 169,879    | 96,661       | 87.61  | 35.10               |
| 27 | ASD051 | 116,122    | 66,073       | 87.41  | 35.06               |
| 28 | ASD052 | 91,188     | 51,885       | 87.59  | 35.11               |
| 29 | ASD053 | 115,546    | 65,745       | 87.38  | 35.05               |
| 30 | ASD054 | 118,956    | 67,685       | 88.43  | 35.29               |
| 31 | ASD055 | 105,393    | 59,968       | 87.81  | 35.14               |
| 32 | ASD056 | 99,169     | 56,427       | 88.40  | 35.28               |
| 33 | ASD057 | 93,034     | 52,936       | 88.29  | 35.25               |
| 34 | ASD058 | 103,7      | 59,005       | 87.49  | 35.08               |
| 35 | ASD059 | 93,37      | 53,127       | 87.24  | 35.01               |
| 36 | ASD060 | 91,262     | 51,928       | 86.53  | 34.86               |
| 37 | ASD061 | 90,346     | 51,406       | 87.92  | 35.15               |
| 38 | ASD062 | 90,172     | 51,307       | 87.98  | 35.18               |
| 39 | ASD063 | 103,342    | 58,801       | 88.00  | 35.19               |
| 40 | ASD064 | 139,269    | 79,244       | 87.71  | 35.13               |
| 41 | ASD065 | 150,987    | 85,911       | 87.43  | 35.06               |
| 42 | ASD066 | 145,56     | 82,823       | 87.24  | 35.02               |
| 43 | ASD067 | 136,286    | 77,546       | 86.62  | 34.88               |
| 44 | ASD068 | 145,483    | 82,779       | 87.64  | 35.10               |
| 45 | ASD069 | 144,006    | 81,939       | 87.20  | 35.01               |
| 46 | ASD070 | 145,072    | 82,545       | 87.54  | 35.09               |
| 47 | ASD071 | 131,541    | 74,846       | 87.57  | 35.10               |
| 48 | ASD072 | 169,413    | 96,395       | 87.81  | 35.15               |
| 49 | ASD073 | 180,706    | 102,821      | 88.21  | 35.24               |
| 50 | ASD074 | 151,876    | 86,417       | 87.32  | 35.04               |
| 51 | ASD075 | 126,173    | 71,792       | 87.00  | 34.96               |
| 52 | ASD076 | 120,554    | 68,595       | 86.88  | 34.95               |
| 53 | ASD077 | 143,931    | 81,896       | 87.77  | 35.13               |
| 54 | NUC001 | 149,7      | 85,179       | 87.96  | 35.18               |
| 55 | NUC002 | 131,637    | 74,901       | 88.69  | 35.35               |
| 56 | NUC003 | 100,436    | 57,148       | 86.95  | 34.96               |
| 57 | NUC005 | 151,361    | 86,124       | 87.56  | 35.09               |

|              |        |                   |                  |              |              |
|--------------|--------|-------------------|------------------|--------------|--------------|
| 58           | NUC007 | 148,574           | 84,538           | 87.24        | 35.01        |
| 59           | NUC012 | 1,933,900         | 1,100,389        | 87.28        | 35.02        |
| 60           | NUC013 | 158,13            | 89,975           | 86.73        | 34.89        |
| 61           | NUC016 | 167,996           | 95,589           | 87.53        | 35.07        |
| 62           | NUC017 | 150,135           | 85,426           | 87.95        | 35.17        |
| 63           | NUC018 | 144,939           | 82,47            | 87.91        | 35.16        |
| 64           | NUC023 | 140,838           | 80,136           | 86.99        | 34.96        |
| 65           | NUC024 | 158,094           | 89,955           | 87.25        | 35.00        |
| 66           | NUC025 | 143,326           | 81,552           | 87.01        | 34.96        |
| 67           | NUC026 | 139,716           | 79,498           | 86.76        | 34.89        |
| 68           | NUC027 | 131,401           | 74,767           | 85.88        | 34.70        |
| 69           | NUC028 | 133,615           | 76,026           | 87.08        | 34.96        |
| 70           | NUC029 | 133,202           | 75,791           | 87.37        | 35.05        |
| 71           | NUC030 | 134,331           | 76,434           | 87.28        | 35.03        |
| 72           | NUC031 | 152,8             | 86,943           | 87.91        | 35.17        |
| 73           | NUC032 | 131,665           | 74,917           | 87.46        | 35.07        |
| 74           | NUC033 | 150,454           | 85,608           | 87.62        | 35.11        |
| 75           | NUC034 | 132,362           | 75,313           | 87.67        | 35.11        |
| 76           | NUC035 | 124,624           | 70,911           | 87.52        | 35.08        |
| 77           | NUC036 | 137,494           | 78,234           | 87.51        | 35.07        |
| 78           | NUC037 | 129,168           | 73,496           | 87.91        | 35.17        |
| 79           | NUC038 | 122,264           | 69,568           | 87.84        | 35.16        |
| 80           | NUC040 | 142,348           | 80,996           | 88.10        | 35.21        |
| <b>Total</b> |        | <b>10.919.413</b> | <b>1.330.145</b> | <b>87,50</b> | <b>35,07</b> |

**Supplementary Table S4. Various statistics describing the sorted reads of 80 saliva samples**

(Autism Spectrum Disorder, ASD n=53 and neurologically unaffected control, NUC =27).

All reads are passed filter, i.e. reads have passed the default Illumina filter procedure (chastity filter); \*Yield (Kbp): number of bases called in kilobases. \*\* %Q30: percentage of bases with a quality score of at least 30 (inferred base call accuracy of 99.9%). † Mean Q: Q-score is a prediction of the probability of a wrong base call.
